# Supplementary material for: Nitrogen-doped orange emitting carbon dots for β-carotene detection and lysosomal imaging
Source: Royal Society of Chemistry journal article supplement (doi:10.1039/d3an00319a), 2023-01-01
Supplement: d3an00319a1.pdf [file d3an00319a1.pdf]

**Supporting Information**

**Nitrogen-doped orange emitting carbon dots for  $\beta$ -carotene detection and lysosomal imaging**

Xinlu Li, <sup>a, c</sup> Tongtong Zhu, <sup>a, c</sup> Yuwei Du, <sup>a, c</sup> Haiyang Yan, <sup>a, c</sup> Ruhong Yan, <sup>\*, b, c</sup> Wen-Fei Dong, <sup>\*, a, c</sup> and Li Li <sup>\*, c, d</sup>

a. School of Biomedical Engineering (Suzhou), Division of Life Sciences and Medicine, University of Science and Technology of China, Hefei 230026, China.

b. Department of Clinical Laboratory, Suzhou Hospital, Affiliated Hospital of Medical School, Nanjing University, Suzhou, 215153, China.

E-mail: yrhzl@hotmail.com

c. CAS Key Laboratory of Biomedical Diagnostics, Suzhou Institute of Biomedical Engineering and Technology, Chinese Academy of Science (CAS), Suzhou 215163, China.

E-mail: wenfeidong@sibet.ac.cn.

d. Jinan Guokeyigong Science and Technology Development Co., Ltd, Jinan, 250104, China.

Email: [lil@sibet.ac.cn](mailto:lil@sibet.ac.cn)

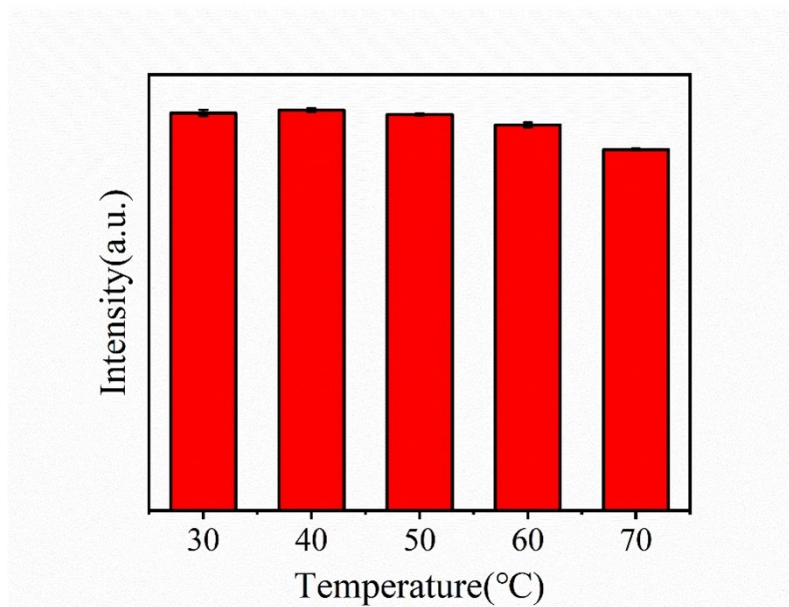

Fig. S1 Fluorescence intensity of O-CDs at different temperatures

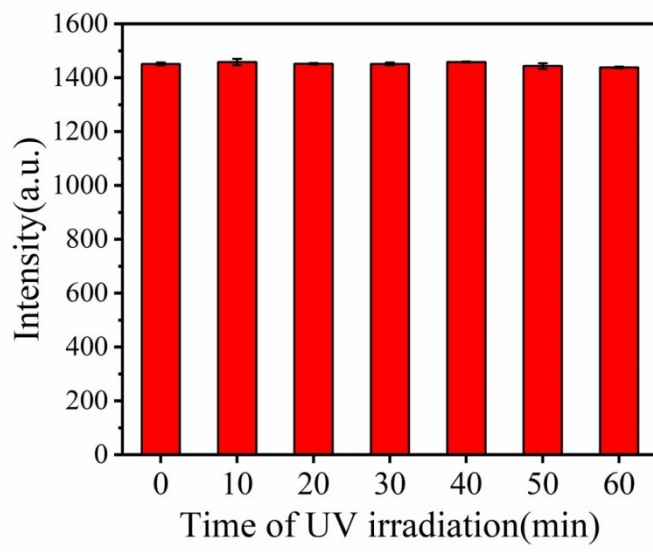

Fig. S2 Fluorescence intensity of O-CDs after a period of UV irradiation

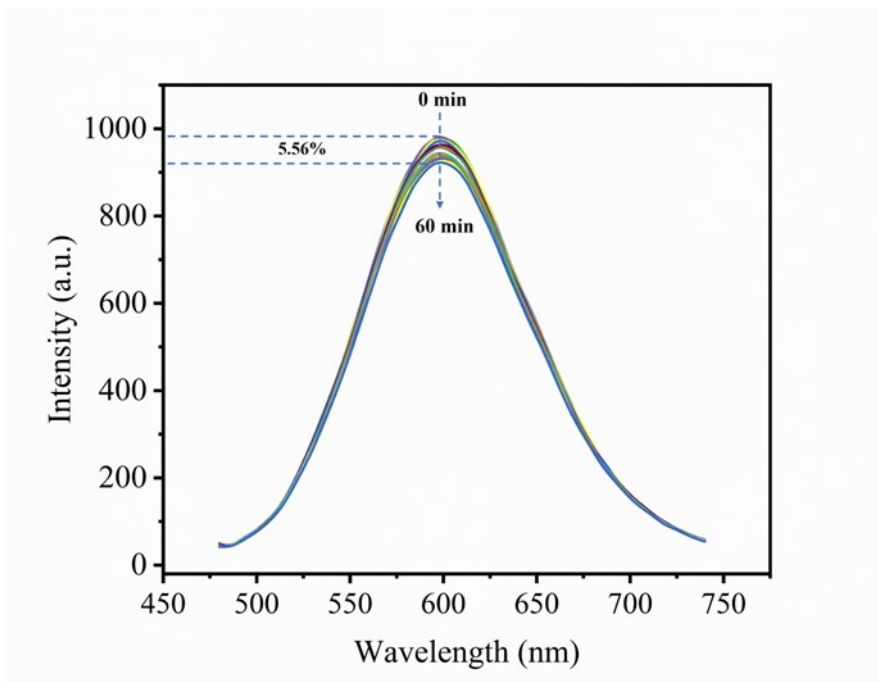

Fig. S3 Variation of the FL intensity of the O-CDs between 0-60 min under the irradiation of 470 nm.

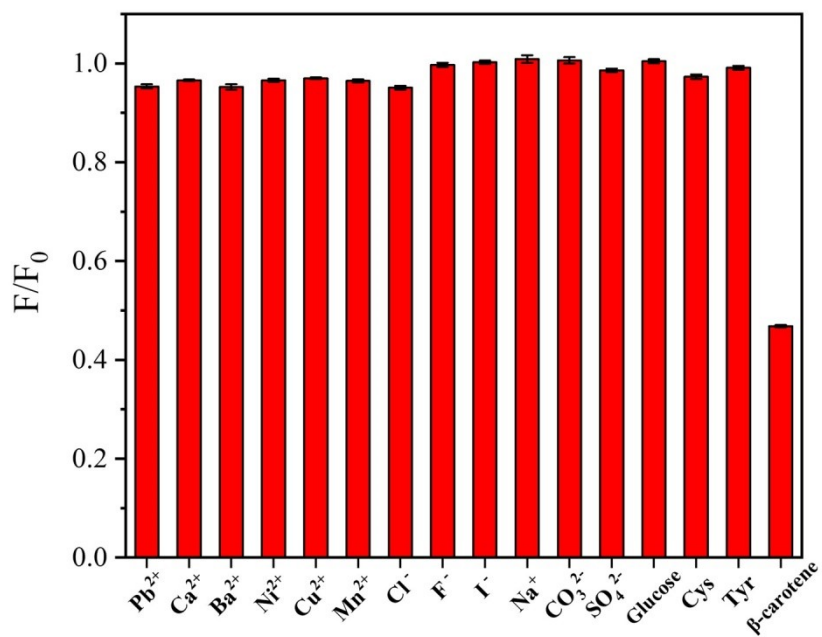

Fig. S4 The ratio of fluorescence intensity of O-CDs solution before and after adding every substances.

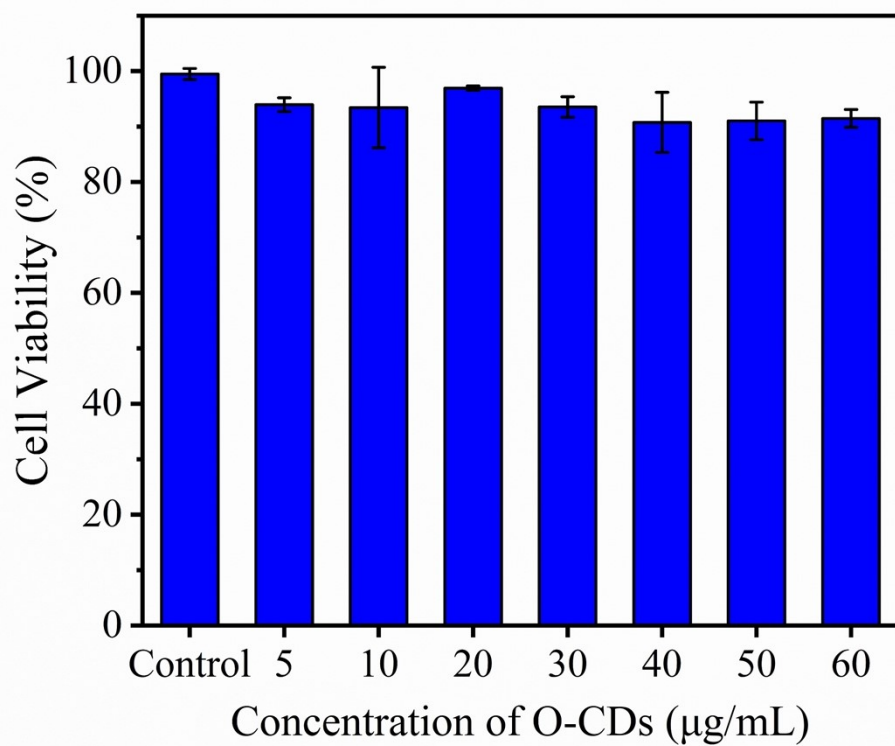

Fig. S5 Cell viability of HeLa cells incubated with 0 to 60 µg/mL O-CDs for 24 h.

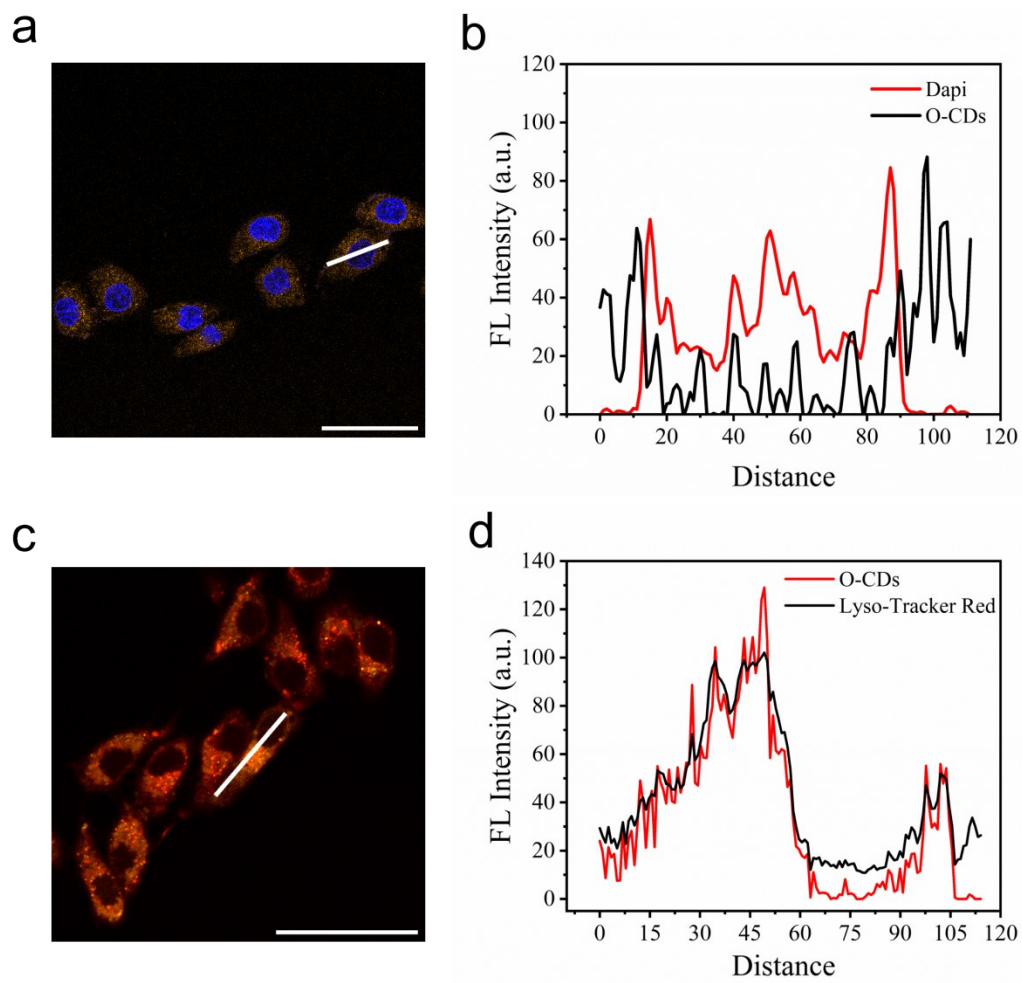

Fig. S6 (a-b) The fluorescence intensity of the region of interest (ROIs) in the HeLa cells in the O-CDs and DAPI dihydrochloride channels. (c-d) The fluorescence intensity of the region of interest (ROIs) in the HeLa cells in the O-CDs and Lyso-Tracker Red channels.

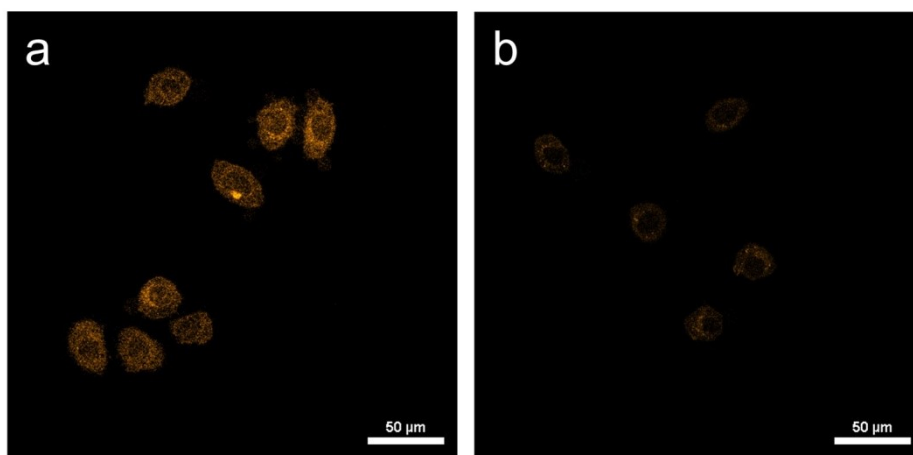

Fig. S7 (a) Confocal laser scanning microscope (CLSM) images of HeLa cells incubated at 37°C. (b) Images of HeLa cells incubated at 4°C.



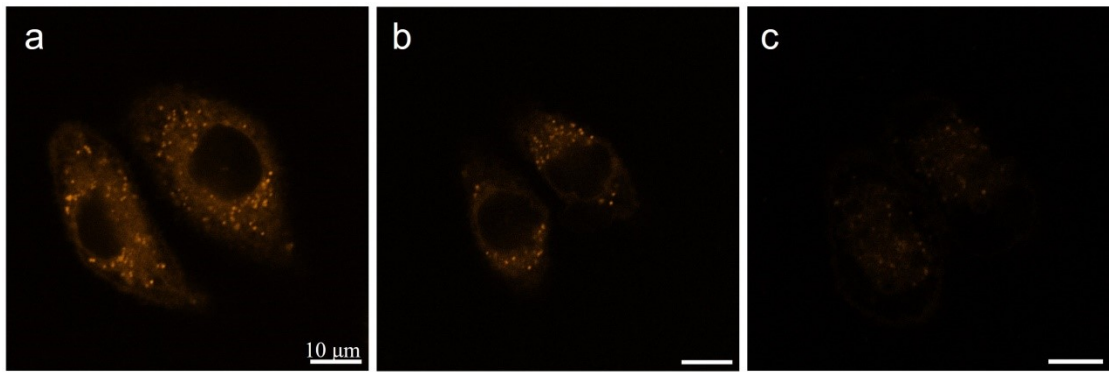

Fig. S8 Necrosis evolution tracking of HeLa cells induced by NaOH solution.

Table 1. Comparison of the different approach with other reported methods for determining  $\beta$ -carotene

| Method                 | Linear range            | Detection limit     | Ref.      |
|------------------------|-------------------------|---------------------|-----------|
| Oxidation Voltammetric | 9.9-91.4 $\mu\text{M}$  | 1.9 $\mu\text{M}$   | 1         |
| Electrochemistry       | 1-150 $\mu\text{M}$     | 1 nA/ $\mu\text{M}$ | 2         |
| MnTTPCl/n-Au           | 9.8-115.4 $\mu\text{M}$ | —                   | 3         |
| POSS@ANT               | 0.2-4.3 mg/L            | 0.081 mg/L          | 4         |
| O-CDs                  | 20-2000 $\mu\text{M}$   | 2.75 $\mu\text{M}$  | This work |

Table 2. Results for the determination of  $\beta$ -carotene in real samples. (n = 3)

| Sample           | Added<br>( $\mu\text{mol/L}$ ) | Found<br>( $\mu\text{mol/L}$ ) | Recovery<br>(%) | RSD<br>(%) |
|------------------|--------------------------------|--------------------------------|-----------------|------------|
| capsule          | —                              | 270.55                         | —               | 1.36       |
|                  | 200                            | 199.23                         | 99.61           | 1.50       |
|                  | 250                            | 236.58                         | 94.63           | 0.79       |
|                  | 300                            | 283.48                         | 94.49           | 0.62       |
| soft gel capsule | —                              | 335.39                         | —               | 0.72       |
|                  | 200                            | 216.42                         | 108.21          | 0.62       |
|                  | 250                            | 260.04                         | 104.01          | 0.64       |
|                  | 300                            | 296.69                         | 98.90           | 1.63       |

## References

1. T. B. Koc, E. Kuyumcu Savan and I. Karabulut, *Analytical Letters*, 2022, **55**, 891-903.
2. G. Thompson, S. Marnoto and J. M. Halpern, *ECS Transactions*, 2017, **80**, 1177.
3. A. Lascu, M. Birdeanu, B. Taranu and E. Fagadar-Cosma, *Journal of Chemistry*, 2018, **2018**, 5323561.
4. D. Li, P. Zhou, Y. Hu, G. Li and L. Xia, *Luminescence*, 2022, **37**, 1290-1299.
